# Supplementary material
Source: MDPI journal article supplement (https://www.mdpi.com/2073-4395/12/8/1884)
Supplement: s1 [file s1]

## Supplementary Materials

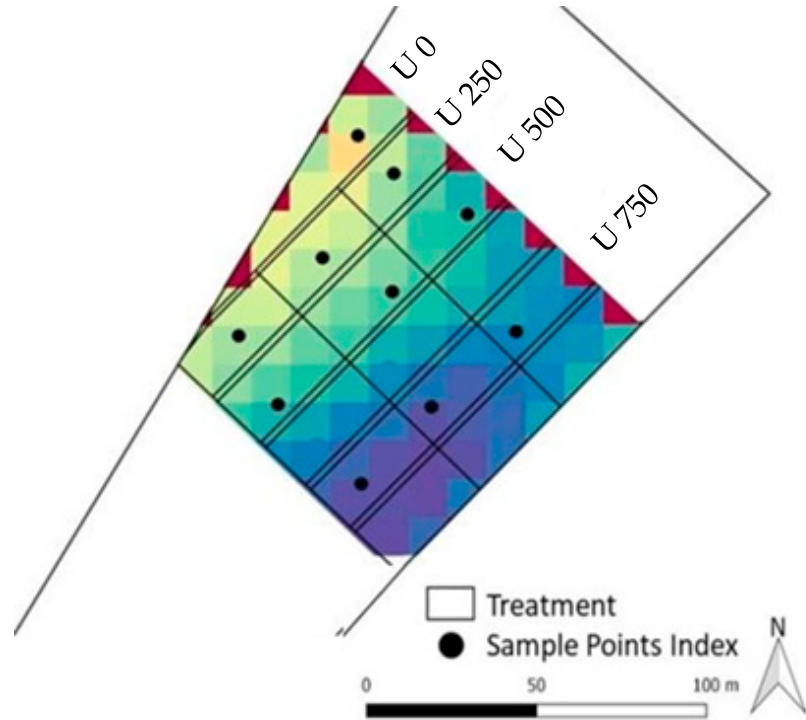

**Figure S1.** Map of the study area, showing the location of the experimental site (Hilario Ascasubi, Buenos Aires province, Argentina) with the sample points.

**Table S1.** Geopositioning of sampling points in the field experimental design.

| Treatment<br>Sample Point | Pixel-X | Pixel-Y | Longitude               | Latitude               |
|---------------------------|---------|---------|-------------------------|------------------------|
| U 0                       | 35.5    | 25.5    | -62,62,215,748,609,030  | -39,39,585,841,554,580 |
| U 250                     | 36.5    | 26.5    | -62,622,040,868,071,300 | -39,39,594,814,381,910 |
| U 250                     | 34.5    | 28.5    | -62,622,272,160,128,200 | -39,39,612,910,902,470 |
| U 250                     | 32.5    | 30.5    | -62,62,250,345,338,010  | -39,39,631,007,377,070 |
| U 500                     | 38.5    | 27.5    | -62,62,180,811,765,850  | -39,39,603,749,454,560 |
| U 500                     | 36.5    | 29.5    | -62,62,203,940,940,340  | -39,39,621,846,020,960 |
| U 500                     | 33.5    | 32.5    | -62,622,386,349,261,700 | -39,39,648,990,784,380 |
| U 750                     | 39.5    | 30.5    | -62,621,690,525,546,600 | -39,39,630,743,337,790 |
| U 750                     | 37.5    | 32.5    | -62,62,192,181,787,160  | -39,39,648,839,927,020 |
| U 750                     | 35.5    | 34.5    | -62,622,153,111,391,800 | -39,39,666,936,470,270 |
